# Supplementary material for: In vivo vocal fold augmentation using an injectable polyethylene glycol hydrogel based on click chemistry
Source: Royal Society of Chemistry journal article supplement (doi:10.1039/d0bm01155j), 2020-10-15
Supplement: d0bm01155j1.pdf [file d0bm01155j1.pdf]

## Supporting Information

### *In vivo* vocal fold augmentation using an injectable polyethylene glycol hydrogel based on click chemistry

Soonmin Kwon, Hyunsu Choi, Changhee Park, Sangkee Choi, Eunha Kim, Sung Won Kim, Choung-Soo Kim and Heebeom Koo

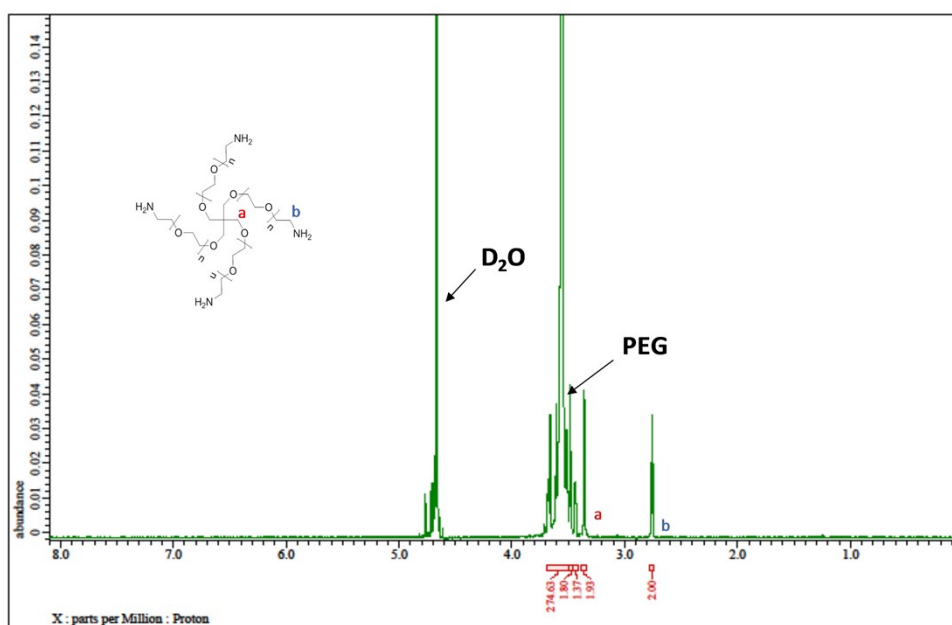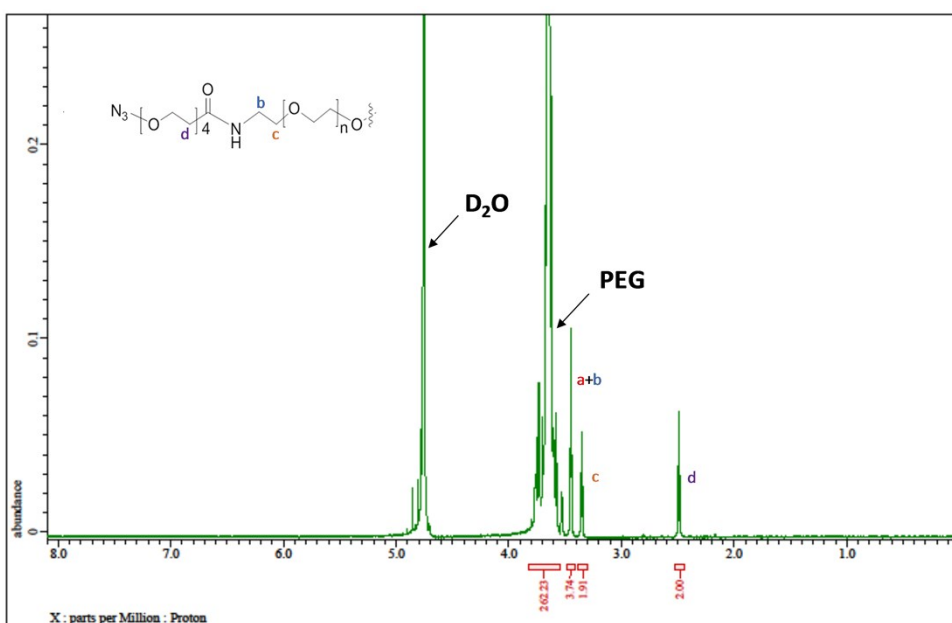

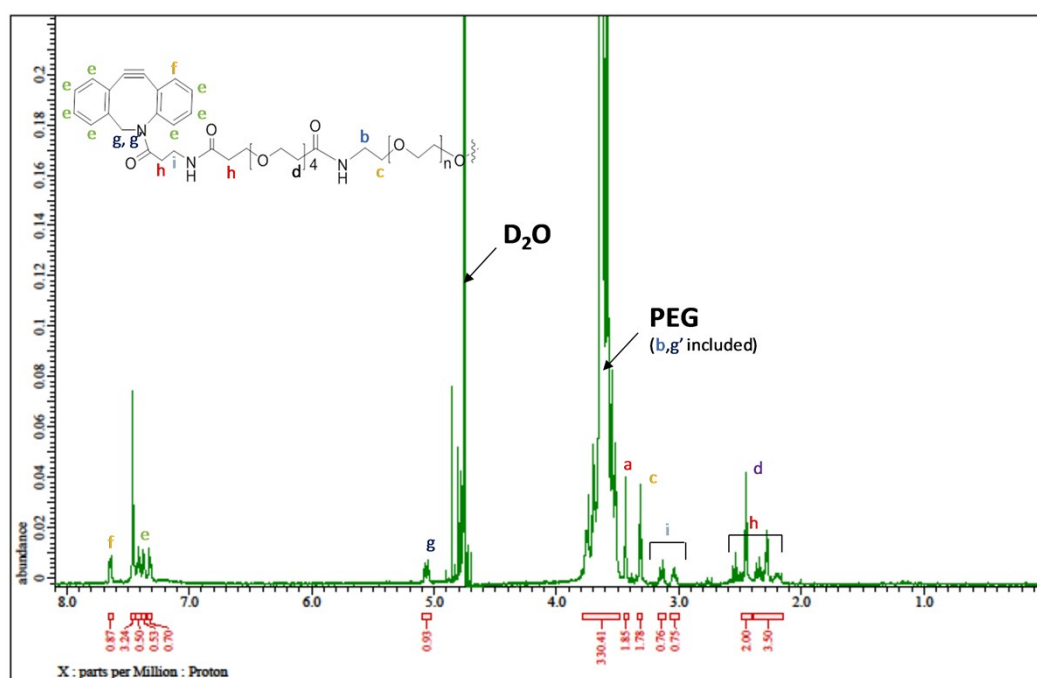

**Figure S1.** <sup>1</sup>H NMR spectra of 4-arm PEG-amine, 4arm-PEG-N<sub>3</sub>, and 4-arm PEG-DBCO.

| 4arm-PEG-N <sub>3</sub> :4arm-PEG-DBCO<br>(weight ratio) | Gelation |
|----------------------------------------------------------|----------|
| 1 : 7                                                    | X        |
| 1 : 3                                                    | X        |
| 1 : 2                                                    | O        |
| 1 : 1                                                    | O        |
| 2 : 1                                                    | O        |
| 3 : 1                                                    | X        |
| 7 : 1                                                    | X        |

**Figure S2.** Gelation of hydrogel formulations according to the ratio of 4arm-PEG-N<sub>3</sub> and 4arm-PEG-DBCO. Total weight concentration maintained at 4 wt%.

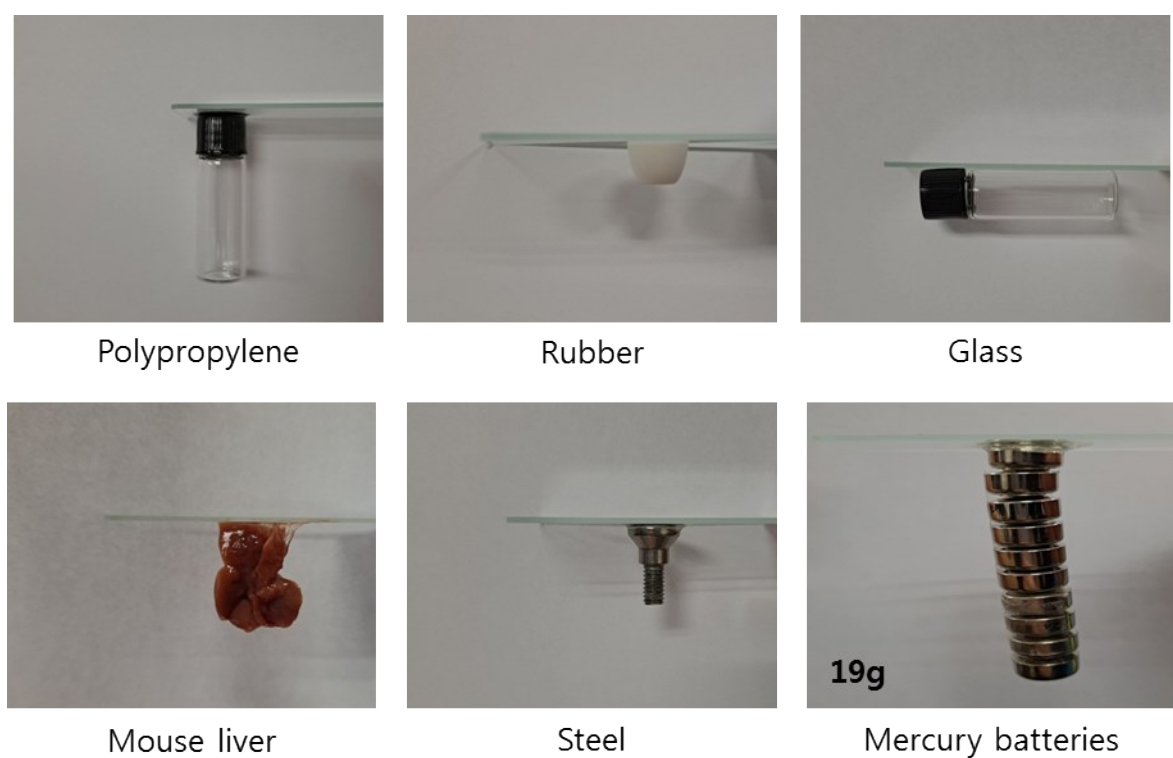

**Figure S3.** Images showing adhesion of PEG hydrogels onto various materials

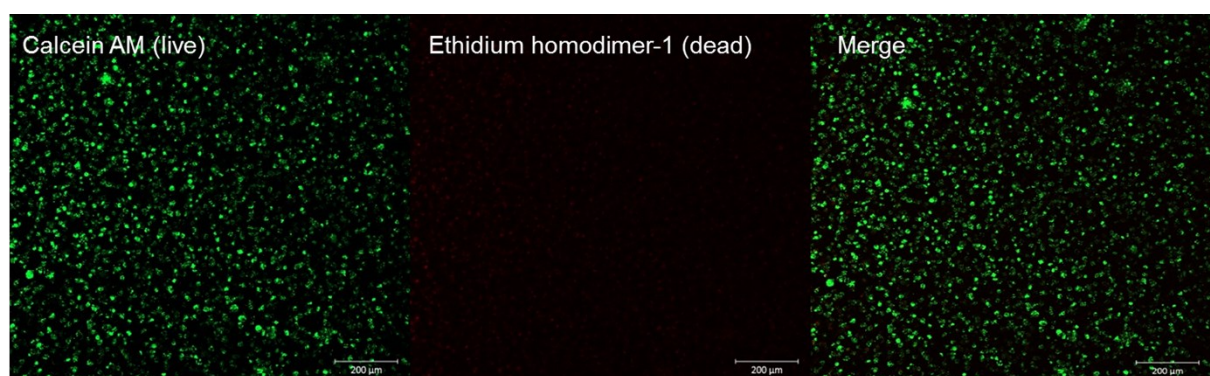

**Figure S4.** Confocal image of NIH3T3 cells grown in PEG hydrogel for 1 day (Green: live cells (Calcein AM), red: dead cells (Ethidium homodimer-1)).
